# Supplementary material
Source: Springer Nature journal article supplement (https://www.springermedizin.de/resource/supplementary/13054_2014_2588_MOESM6_ESM.pdf/9714402)

A

WT

Sham

CLP

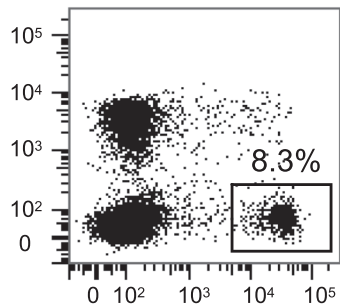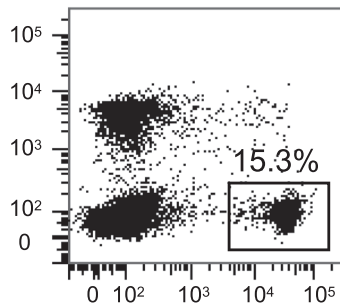CD4 *Ripk3*<sup>-/-</sup>

CD8

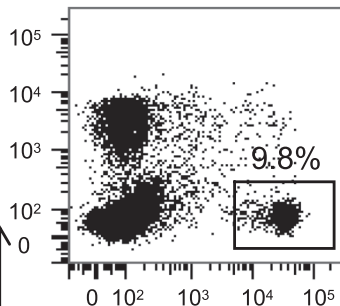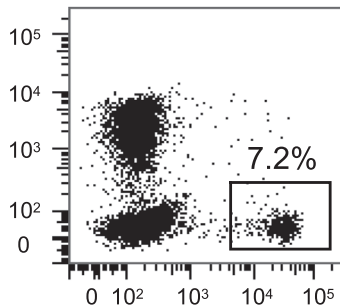

B

CD8T cell frequency (%)

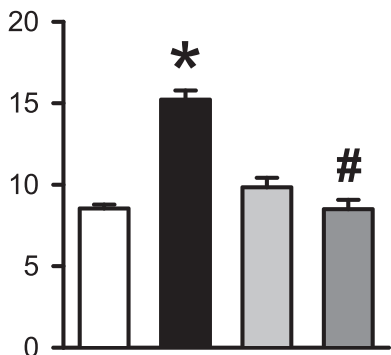CD8T cell number ( $\times 10^6$ )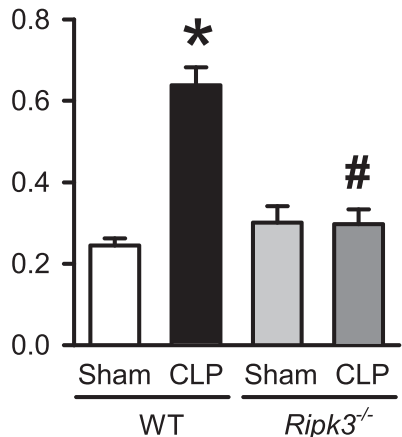

Supplement: MOESM6 [file 9714402]
